# Supplementary material
Source: PubMed Central journal article supplement (PMC4097702)
Supplement: JCM.00642-14_zjm999093542so1.pdf [file JCM.00642-14_zjm999093542so1.pdf]

**Supporting table 1:** Smear result by HIV infection status (culture as reference standard, per-specimen) (N=575\*)

| Smear Method                   | Culture results (n) <sup>3</sup> |                 |              | Sensitivity<br>(95% CI) <sup>1</sup> | P-value <sup>2</sup> | Specificity<br>(95% CI) <sup>1</sup> | P-value <sup>2</sup> | PPV            | NPV              |
|--------------------------------|----------------------------------|-----------------|--------------|--------------------------------------|----------------------|--------------------------------------|----------------------|----------------|------------------|
|                                | MTB<br>not<br>detected           | MTB<br>detected | Contaminated |                                      |                      |                                      |                      |                |                  |
| HIV Uninfected (N=98)          |                                  |                 |              |                                      |                      |                                      |                      |                |                  |
|                                | (n=75)                           | (n=17)          | (n=0)        | (n=17)                               |                      | (n=81)                               |                      |                |                  |
| Direct smear<br>positive       | 1                                | 14              | 0            | 14<br>82.4%<br>(56.8-100%)           | 1.000                | 80<br>98.8%<br>(96.3-100%)           | 1.000                | 14/15<br>93.3% | 80/83<br>96.4%   |
| Concentrated<br>smear positive | 2                                | 14              | 0            | 14<br>82.4%<br>(56.8-100%)           | 1.000                | 79<br>97.5%<br>(95.0-100%)           | 1.000                | 14/16<br>87.5% | 79/82<br>96.3%   |
| SMF smear<br>positive          | 1                                | 13              | 0            | 13<br>76.5%<br>(44.4-100%)           |                      | 80<br>98.8%<br>(96.4-100%)           |                      | 13/14<br>92.9% | 80/84<br>95.2%   |
| HIV Infected (N=477)           |                                  |                 |              |                                      |                      |                                      |                      |                |                  |
|                                | (n=318)                          | (n=151)         | (n=8)        | (n=151)                              |                      | (n=318)                              |                      |                |                  |
| Direct smear<br>positive       | 6                                | 88              | 0            | 88<br>58.3%<br>(47.5-69.0%)          | 0.0003               | 312<br>97.4%<br>(94.9-98.9%)         | 0.0625               | 88/94<br>93.6% | 312/375<br>83.2% |

|                             |   |    |   |                             |         |                              |        |                |                  |
|-----------------------------|---|----|---|-----------------------------|---------|------------------------------|--------|----------------|------------------|
| Concentrated smear positive | 9 | 92 | 0 | 92<br>60.9%<br>(50.0-71.8%) | <0.0001 | 309<br>96.4%<br>(93.7-98.2%) | 0.0078 | 92/99<br>91.1% | 309/368<br>84.0% |
| SMF smear positive          | 1 | 68 | 0 | 68<br>45.0%<br>(32.6-57.5%) |         | 317<br>98.7%<br>(96.7-99.6%) |        | 68/69<br>98.6% | 317/400<br>79.3% |

\* Two patients did not have HIV results available; one provided three sputum specimens and the other one specimen (total missing n=4)

MTB= Mycobacterium tuberculosis; CI= Confidence interval; PPV= Positive predictive value; NPV= Negative predictive value

<sup>1</sup> Ratio estimators used to adjust confidence intervals for specimen clustering resulting from multiple specimens per participant

<sup>2</sup> P-values calculated using McNemar's test. All comparisons are against SMF smear method

<sup>3</sup> Includes any culture-positive (MGIT or Lowenstein-Jensen media) result for same specimen
